# Supplementary material for: First Detection and Identification of FAdV-8b as the Causative Agent of an Outbreak of Inclusion Body Hepatitis in a Commercial Broiler Farm in Greece
Source: MDPI journal article supplement (doi:10.3390/vetsci9040160), 2022-03-25
Supplement: s1 [file s1]

## Article

# First isolation and identification of FAdV-8b as the causative agent of an outbreak of Inclusion Body Hepatitis in a commercial broiler farm in Greece

Vasilios Tsiouris<sup>1</sup>, Tilemachos Mantzios<sup>1\*</sup>, Konstantinos Kiskinis<sup>1</sup>, Jean-Luc Guérin<sup>2,3</sup>, Guillaume Croville<sup>2,3</sup>, Georgia D. Brellou<sup>4</sup>, Emmanouela P. Apostolopoulou<sup>4</sup>, Evanthia Petridou<sup>5</sup> and Ioanna Georgopoulou<sup>1</sup>

**Table S1.** Available epidemiological data, for the total of 42 reference strains which were used for the construction of the phylogenetic tree in this study.

|    | Acc. No.   | FAdV-Group | Strain ID           | Country     | Year (Collection) | PMID                     |
|----|------------|------------|---------------------|-------------|-------------------|--------------------------|
| 1  | EU861033   | A          | PA62/06             | Italy       | 2006              |                          |
| 2  | AF339914   | A          | CELO                | -           | -                 | <a href="#">19184959</a> |
| 3  | EF685377   | A          | 05-50052-2324-2H    | Canada      | 2005              | --                       |
| 4  | KR259656   | A          | FadV Wroclaw 2015   | Poland      | 2015              | -                        |
| 5  | EF685396   | A          | 04-42605            | Canada      | 2007              | <a href="#">21088178</a> |
| 6  | FN557181.1 | A          | 09-1567-9           | Germany     | 2009              | -                        |
| 7  | JN181575.1 | A          | K181/10             | South Korea | 2010              | <a href="#">22499868</a> |
| 8  | EF685382.1 | A          | 05-34275-1837H      | Canada      | 2005              | -                        |
| 9  | GU952110.1 | A          | PL/060/08           | Poland      | 2008              | <a href="#">21489943</a> |
| 10 | AF508952.2 | B          | 340/ EU FAdV 5      | -           | -                 | <a href="#">15276983</a> |
| 11 | AF508953.1 | B          | TR22/ EU FAdV 5     | -           | 2002              | <a href="#">15276983</a> |
| 12 | AF339919.1 | B          | ATCC VR-830; T8-A   | -           | 2001              | <a href="#">19184959</a> |
| 13 | FN869988.1 | B          | 09-7473-2           | Hungary     | 2009              | <a href="#">20869988</a> |
| 14 | EU979371.1 | B          | 340/ FAdV 5         |             | 2009              | <a href="#">19036935</a> |
| 15 | FN869987.1 | B          | 09-7470-2           | Hungary     | 2009              | <a href="#">20869988</a> |
| 16 | FN869991.1 | B          | 09-6893             | Hungary     | 2009              | <a href="#">20869988</a> |
| 17 | FN869990.1 | B          | 08-8669             | Austria     | 2008              | <a href="#">20869988</a> |
| 18 | FN869989.1 | B          | 08-21472            | Austria     | 2008              | <a href="#">20869988</a> |
| 19 | KX269146.1 | C          | HeNanMZQ            | China       | 2015              | -                        |
| 20 | KT999720.1 | C          | Shandong            | China       | 2015              | -                        |
| 21 | AF339924.1 | C          | ATCC VR-835; X-11A  | -           | -                 | <a href="#">19184959</a> |
| 22 | KX179505.1 | C          | 1877570             | Pakistan    | 2015              | -                        |
| 23 | AF339917.1 | C          | ATCC VR-829; J2-A   | -           | -                 | <a href="#">19184959</a> |
| 24 | AF508950.1 | C          | 506/ EU FAdV 4      | -           | -                 | <a href="#">15276983</a> |
| 25 | MG765466.1 | C          | ID-HCI-036          | Peru        | 2016              | -                        |
| 26 | GU108581.1 | C          | -                   | -           | -                 | -                        |
| 27 | KX247375.1 | D          | 1877566             | Pakistan    | 2015              | -                        |
| 28 | AF339916.1 | D          | ATCC VR-828; IBH-2A | -           | -                 | <a href="#">19184959</a> |
| 29 | AF508958.2 | D          | 764/EU FAdV 9       | -           | -                 | <a href="#">15276983</a> |
| 30 | AF508959.2 | D          | C2B                 | -           | -                 | <a href="#">15276983</a> |
| 31 | DQ323986.1 | D          | Stanford            | USA         | 2005              | <a href="#">17461263</a> |
| 32 | AF339915.1 | D          | ATCC VR-827; P7-A   | -           | -                 | <a href="#">19184959</a> |
| 33 | AF339920.1 | D          | X11                 | -           | -                 | <a href="#">19184959</a> |
| 34 | AF508946.1 | D          | SR48                | -           | -                 | <a href="#">15276983</a> |
| 35 | AF508948.2 | D          | SR49                | -           | -                 | <a href="#">15276983</a> |

---

|    |            |   |                   |          |      |                          |
|----|------------|---|-------------------|----------|------|--------------------------|
| 36 | JF917237.1 | E | UPMPH04217        | Malaysia | 2004 | -                        |
| 37 | EF685497.1 | E | 04-53357-113      | Canada   | 2004 | -                        |
| 38 | KX247373.1 | E | 2024683           | Pakistan | 2015 | -                        |
| 39 | AF508954.2 | E | CR119             | -        | -    | <a href="#">15276983</a> |
| 40 | AF508956.2 | E | TR59              | -        | -    | <a href="#">15276983</a> |
| 41 | MG765463.1 | E | ID-HCI-023        | Peru     | 2015 |                          |
| 42 | AF339922.1 | E | ATCC VR-832; B-3A | -        | -    | <a href="#">19184959</a> |

---
